# Supplementary material
Source: Springer Nature journal article supplement (https://www.springermedizin.de/resource/supplementary/13013_2013_649_MOESM3_ESM.pdf/9632140)

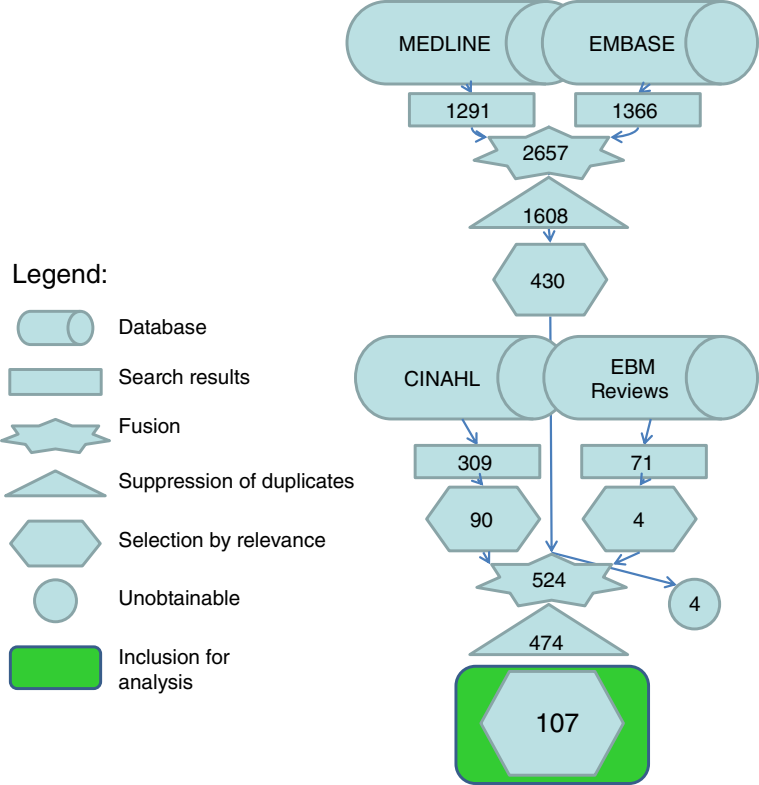

Supplement: MOESM3 [file 9632140]
